# Supplementary material
Source: HighWire-hosted journal article supplement (https://www.cmaj.ca/highwire/filestream/57981/field_highwire_adjunct_files/0/in-singh-appendix_1.pdf)
Supplement: in-singh-appendix_1.pdf [file in-singh-appendix_1.pdf]

## Appendix 1: Scope of practice for paramedic flight crews

|                                                    | Primary care paramedics | Advanced care paramedics | Critical care paramedics |
|----------------------------------------------------|-------------------------|--------------------------|--------------------------|
| <b>AIRWAY PROCEDURES</b>                           |                         |                          |                          |
| Bag-valve-mask ventilation                         | X                       | X                        | X                        |
| Nasotracheal intubation                            |                         | X                        | X                        |
| Orotracheal intubation                             |                         | X                        | X                        |
| Foreign object removal                             |                         | X                        | X                        |
| Other Advanced Life Support airway                 |                         | X                        | X                        |
| Laryngeal mask airway                              |                         | X                        | X                        |
| Ascherman chest seal                               |                         | X                        | X                        |
| Needle thoracostomy                                |                         | X                        | X                        |
| Needle / surgical cricothyrotomy                   |                         |                          | X                        |
| <b>CARDIAC RESUSCITATION</b>                       |                         |                          |                          |
| Cardiopulmonary resuscitation / chest compressions | X                       | X                        | X                        |
| Cardioversion                                      |                         | X                        | X                        |
| Carotid sinus massage                              |                         | X                        | X                        |
| Precordial thump                                   |                         | X                        | X                        |
| Manual defibrillation                              |                         | X                        | X                        |
| Automatic defibrillation                           |                         | X                        | X                        |
| External pacing                                    |                         | X                        | X                        |
| Dextrose or glucagon administration*               | X                       | X                        | X                        |
| <b>MEDICATIONS</b>                                 |                         |                          |                          |
| Vasopressor medications *†                         |                         | X                        | X                        |

\*Administration of any medication by a paramedic is at the discretion of the medical director.

†Infusions of dopamine, norepinephrine, epinephrine and vasopressin.
